# Supplementary material for: Serological fingerprints link antiviral activity of therapeutic antibodies to affinity and concentration
Source: PubMed Central journal article supplement (PMC9672333; doi:10.1038/s41598-022-22214-z), 2022-11-17
Supplement: 41598_2022_22214_MOESM1_ESM.pdf [file 41598_2022_22214_MOESM1_ESM.pdf]

# Supplementary Information

## Serological fingerprints link antiviral activity of therapeutic antibodies to affinity and concentration

Sebastian Fiedler<sup>1</sup>, Sean R. A. Devenish<sup>1</sup>, Alexey S. Morgunov<sup>1,2</sup>, Alison Ilsley<sup>1</sup>, Francesco Ricci<sup>1</sup>, Marc Emmenegger<sup>3</sup>, Vasilis Kosmoliaptsis<sup>4,5,6</sup>, Elitza S. Theel<sup>7</sup>, John R. Mills<sup>8,9</sup>, Anton M. Sholukh<sup>10</sup>, Adriano Aguzzi<sup>3</sup>, Akiko Iwasaki<sup>11,12,13,14</sup>, Andrew K. Lynn<sup>1</sup>, Tuomas P. J. Knowles<sup>1,2,15\*</sup>

<sup>1</sup>Fluidic Analytics, Unit A, The Paddocks Business Centre, Cherry Hinton Road, Cambridge CB1 8DH, United Kingdom

<sup>2</sup>Centre for Misfolding Diseases, Yusuf Hamied Department of Chemistry, University of Cambridge, Lensfield Road, Cambridge CB2 1EW, United Kingdom

<sup>3</sup>Institute of Neuropathology, University of Zurich, 8091 Zurich, Switzerland

<sup>4</sup>Department of Surgery, University of Cambridge, Addenbrookes Hospital, Cambridge, CB2 0QQ, United Kingdom

<sup>5</sup>NIHR Blood and Transplant Research Unit in Organ Donation and Transplantation, University of Cambridge, Hills Road, Cambridge CB2 0QQ, United Kingdom

<sup>6</sup>NIHR Cambridge Biomedical Research Centre, Hills Road, Cambridge CB2 0QQ, United Kingdom

<sup>7</sup>Division of Clinical Microbiology, Department of Laboratory Medicine and Pathology, Mayo Clinic, Rochester, Minnesota, USA

<sup>8</sup>Department of Laboratory Medicine and Pathology, Mayo Clinic, Rochester, Minnesota, USA

<sup>9</sup>Center for MS and Autoimmune Neurology, Mayo Clinic, Rochester, Minnesota, USA

<sup>10</sup>Vaccine and Infectious Disease Division, Fred Hutchinson Cancer Research Center, Seattle, Washington, USA

<sup>11</sup>Department of Immunobiology, Yale School of Medicine, New Haven, CT 06519, USA

<sup>12</sup>Department of Epidemiology of Microbial Diseases, Yale School of Public Health, New Haven, CT 06510, USA

<sup>13</sup>Department of Molecular, Cellular and Developmental Biology, Yale University, New Haven, CT 06511, USA

<sup>14</sup>Howard Hughes Medical Institute, Chevy Chase, MD 20815, USA

<sup>15</sup>Cavendish Laboratory, Department of Physics, University of Cambridge, JJ Thomson Ave, Cambridge CB3 0HE, United Kingdom

\*to whom correspondence should be addressed: [tpjk2@cam.ac.uk](mailto:tpjk2@cam.ac.uk)

**Table S1.** Mutations within the spike protein shared among SARS-CoV-2 variants<sup>44</sup>.

|               |        | SARS-CoV-2 variant |       |       |       |       |                |                |       |                |        |       |       |                |
|---------------|--------|--------------------|-------|-------|-------|-------|----------------|----------------|-------|----------------|--------|-------|-------|----------------|
| Spike protein |        | Alpha              | Beta  | Gamma | Delta | Kappa | Omicron (BA.1) | Omicron (BA.2) | Eta   | Iota           | Lambda | Mu    |       |                |
| Domain        | Region | Shared mutations   |       |       |       |       |                |                |       |                |        |       |       |                |
| S1            | NTD    | L18F               | L18F  |       |       |       |                |                |       |                |        |       |       |                |
|               |        |                    |       |       | T19R  |       |                | T19I           |       |                |        |       |       |                |
|               |        |                    |       |       |       | P26S  |                |                | P26-  |                |        |       |       |                |
|               |        |                    |       |       |       |       |                | A67V           |       | A67V           |        |       |       |                |
|               |        | H69-<br>V70-       |       |       |       |       |                | H69-<br>V70-   |       | H69-<br>V70-   |        |       |       |                |
|               |        |                    |       |       |       |       |                | T95I           |       |                | T95I   |       | T95I  |                |
|               |        |                    |       |       |       |       |                | G142-<br>V143- |       | G142-<br>V143- |        |       |       |                |
|               |        |                    |       |       |       |       |                | Y144-<br>Y145D |       | Y144-<br>Y145D |        | Y144- |       | Y144S<br>Y145N |
|               |        |                    |       |       |       |       |                |                |       |                |        | D253G | D253N |                |
|               |        |                    |       |       |       |       |                |                | G339D | G339D          |        |       |       |                |
|               |        |                    |       |       |       |       | S371L          | S371F          |       |                |        |       |       |                |
|               |        |                    |       |       |       |       | S373P          | S373P          |       |                |        |       |       |                |
|               |        |                    |       |       |       |       | S375F          | S375F          |       |                |        |       |       |                |
|               |        |                    | K417N | K417T |       |       | K417N          | K417N          |       |                |        |       |       |                |
|               |        |                    |       |       |       |       | N440K          | N440K          |       |                |        |       |       |                |
|               |        |                    |       |       | L452R | L452R |                |                |       |                | L452Q  |       |       |                |
|               |        |                    |       |       |       |       | S477N          | S477N          |       |                |        |       |       |                |
|               |        |                    |       |       |       | T478K | T478K          | T478K          |       |                |        |       |       |                |
|               |        |                    | E484K | E484K |       | E484Q | E484A          | E484A          | E484K | E484K          |        | E484K |       |                |
|               |        |                    |       |       |       |       | Q493R          | Q493R          |       |                |        |       |       |                |
|               |        |                    |       |       |       |       | Q498R          | Q498R          |       |                |        |       |       |                |
|               |        | N501Y              | N501Y | N501Y |       |       | N501Y          | N501Y          |       |                |        | N501Y |       |                |
|               |        |                    |       |       |       |       | Y505H          | Y505H          |       |                |        |       |       |                |
|               |        | D614G              | D614G | D614G | D614G | D614G | D614G          | D614G          | D614G | D614G          | D614G  | D614G |       |                |
|               |        |                    |       | H655Y |       |       | H655Y          | H655Y          |       |                |        |       |       |                |
|               |        |                    |       |       |       |       | N679K          | N679K          |       |                |        |       |       |                |
|               |        | P681H              |       |       | P681R | P681R | P681H          | P681H          |       |                |        | P681H |       |                |
| S2            |        |                    | A701V |       |       |       |                |                |       | A701V          |        |       |       |                |
|               |        |                    |       |       |       |       | N764K          | N764K          |       |                |        |       |       |                |
|               |        |                    |       |       |       |       | D796Y          | D796Y          |       |                |        |       |       |                |
|               |        |                    |       |       |       |       |                |                |       |                |        |       |       |                |
|               | HR1    |                    |       |       | D950N |       |                |                |       |                | D950N  |       |       |                |
|               |        |                    |       |       |       |       | Q954H          | Q954H          |       |                |        |       |       |                |
|               |        |                    |       |       |       |       | N969K          | N969K          |       |                |        |       |       |                |

**Table S2.** Mutations within the spike protein unique among SARS-CoV-2 variants<sup>44</sup>.

|  |        | SARS-CoV-2 variant |        |       |        |       |                |                |     |       |        |    |
|--|--------|--------------------|--------|-------|--------|-------|----------------|----------------|-----|-------|--------|----|
|  |        | Alpha              | Beta   | Gamma | Delta  | Kappa | Omicron (BA.1) | Omicron (BA.2) | Eta | Lota  | Lambda | Mu |
|  |        | Unique mutations   |        |       |        |       |                |                |     |       |        |    |
|  | A570D  | D80A               | T20N   | E156- | E154K  | N211- | L24-           | Q52R           | L5F | G75V  | R346K  |    |
|  | T716I  | D215G              | D138Y  | F157- | Q1071H | L212I | P25-           | Q677H          |     | T76I  |        |    |
|  | S982A  | L241-              | R190S  | R158G |        | G446S | A27S           | F888L          |     | R246- |        |    |
|  | D1118H | L242-              | T1027I |       |        | G496S | V213G          |                |     | S247- |        |    |
|  |        | A243-              | V1176F |       |        | T547K | T376A          |                |     | Y248- |        |    |
|  |        |                    |        |       |        | N856K | D405N          |                |     | L249- |        |    |
|  |        |                    |        |       |        | L981F | R408S          |                |     | T250- |        |    |
|  |        |                    |        |       |        |       |                |                |     | P251- |        |    |
|  |        |                    |        |       |        |       |                |                |     | G252- |        |    |
|  |        |                    |        |       |        |       |                |                |     | F490S |        |    |
|  |        |                    |        |       |        |       |                |                |     | T859N |        |    |

**Table S3.** Summary of unpublished microfluidic antibody affinity profiling data from SARS-CoV-2 convalescent samples shown in Figure 3. Results from samples collected by Blutspendedienst (BDS) Kanton Zürich and University Hospital Zurich (CH) have been published previously in *Life Sci. Alliance* 2021, 5 (2), e202101270.

| Sample source: Working reagent for anti-SARS-CoV-2 immunoglobulin, NIBSC code 21/234. National Institute for Biological Standards and Control (UK) |            |              |              |  |                 |              |              |
|----------------------------------------------------------------------------------------------------------------------------------------------------|------------|--------------|--------------|--|-----------------|--------------|--------------|
|                                                                                                                                                    | $K_D$ (nM) |              |              |  | [antibody] (nM) |              |              |
| antigen                                                                                                                                            | best fit   | lower 95% CI | upper 95% CI |  | best fit        | upper 95% CI | lower 95% CI |
| SARS-CoV-2 wt spike RBD                                                                                                                            | 12.3       | 9.3          | 16.4         |  | 110             | 130          | 93.9         |
| SARS-CoV-2 delta spike RBD                                                                                                                         | 17.5       | 13           | 24.3         |  | 119             | 138          | 98.1         |
| SARS-CoV-2 omicron spike RBD                                                                                                                       | 30.1       | 23           | 39.9         |  | 59.3            | 71.7         | 46.4         |
|                                                                                                                                                    |            |              |              |  |                 |              |              |
| Sample source: Fred Hutchinson Cancer Research Center, Seattle WA, USA                                                                             |            |              |              |  |                 |              |              |
|                                                                                                                                                    | $K_D$ (nM) |              |              |  | [antibody] (nM) |              |              |
| antigen                                                                                                                                            | best fit   | lower 95% CI | upper 95% CI |  | best fit        | lower 95% CI | upper 95% CI |
| SARS-CoV-2 wt spike RBD                                                                                                                            | 11.2       | 3.2          | 26.8         |  | 246             | 76.7         | 452          |
| SARS-CoV-2 wt spike RBD                                                                                                                            | 9.3        | 4.1          | 18.9         |  | 70.5            | 40.5         | 110          |
| SARS-CoV-2 wt spike RBD                                                                                                                            | 6.9        | 3.6          | 12.2         |  | 676.8           | 597          | 813          |
| SARS-CoV-2 wt spike RBD                                                                                                                            | 9.4        | 5.8          | 13.2         |  | 240             | 196          | 281          |
| SARS-CoV-2 wt spike RBD                                                                                                                            | 17.4       | 12.4         | 23.1         |  | 495             | 414          | 583          |
| SARS-CoV-2 wt spike RBD                                                                                                                            | 8.6        | 3.2          | 25.9         |  | 424             | 230          | 777          |
| SARS-CoV-2 wt spike RBD                                                                                                                            | 40.4       | 23.5         | 64.9         |  | 239             | 161          | 324          |
| SARS-CoV-2 wt spike RBD                                                                                                                            | 15.1       | 0.29         | 37.0         |  | 104             | 3.1          | 202          |
| SARS-CoV-2 wt spike RBD                                                                                                                            | 4.5        | 0.01         | 11.2         |  | 190             | 67.7         | 349          |
| SARS-CoV-2 wt spike RBD                                                                                                                            | 10.9       | 3.9          | 27.4         |  | 170             | 77.3         | 275          |
| SARS-CoV-2 wt spike RBD                                                                                                                            | 9.3        | 0.06         | 28.5         |  | 71.7            | 22.0         | 127          |
| SARS-CoV-2 wt spike RBD                                                                                                                            | 5.8        | 1.9          | 11.0         |  | 140             | 99.6         | 192          |
| SARS-CoV-2 wt spike RBD                                                                                                                            | 25.4       | 11.9         | 60.9         |  | 249             | 127          | 400          |
| SARS-CoV-2 wt spike RBD                                                                                                                            | 9.7        | 0.01         | 1108         |  | 9.7             | 0.09         | 1416         |
| SARS-CoV-2 wt spike RBD                                                                                                                            | 9.4        | 3.4          | 16.1         |  | 1778            | 1176         | 2270         |
| SARS-CoV-2 wt spike RBD                                                                                                                            | 30.7       | 11.8         | 62.5         |  | 275             | 146          | 788          |
| SARS-CoV-2 wt spike RBD                                                                                                                            | 6.8        | 1.4          | 19.6         |  | 26.7            | 11.3         | 46           |
| SARS-CoV-2 wt spike RBD                                                                                                                            | 48.3       | 1.0          | 278          |  | 326             | 4.5          | 804          |
| SARS-CoV-2 wt spike RBD                                                                                                                            | 9.2        | 0.01         | 294          |  | 373             | 0.0          | 3441         |
| SARS-CoV-2 wt spike RBD                                                                                                                            | 6.5        | 2.8          | 11.7         |  | 135             | 108          | 178          |
| SARS-CoV-2 wt spike RBD                                                                                                                            | 51.8       | 20.0         | 124          |  | 340             | 103          | 1014         |
| SARS-CoV-2 wt spike RBD                                                                                                                            | 16.3       | 10.5         | 24.1         |  | 297             | 224          | 383          |
| SARS-CoV-2 wt spike RBD                                                                                                                            | 7.4        | 0.02         | 14.3         |  | 96.0            | 32.0         | 151          |
| SARS-CoV-2 wt spike RBD                                                                                                                            | 29.2       | 17.2         | 47.7         |  | 430             | 241          | 583          |
| SARS-CoV-2 wt spike RBD                                                                                                                            | 18.5       | 8.1          | 37.7         |  | 92.0            | 39.0         | 153          |
|                                                                                                                                                    |            |              |              |  |                 |              |              |
|                                                                                                                                                    |            |              |              |  |                 |              |              |
| Sample source: Mayo Clinic, Rochester, MN, USA                                                                                                     |            |              |              |  |                 |              |              |

| antigen                 | $K_D$ (nM) |              |              | [antibody] (nM) |              |              |
|-------------------------|------------|--------------|--------------|-----------------|--------------|--------------|
|                         | best fit   | lower 95% CI | upper 95% CI | best fit        | lower 95% CI | upper 95% CI |
| SARS-CoV-2 wt spike RBD | 0.55       | 0.011        | 1.5          | 2.3             | 1.2          | 5.6          |
| SARS-CoV-2 wt spike RBD | 0.02       | 0.010        | 1.98         | 22.3            | 14.6         | 66.5         |
| SARS-CoV-2 wt spike RBD | 1.0        | 0.013        | 2.8          | 19.4            | 13.1         | 26.2         |
| SARS-CoV-2 wt spike RBD | 0.02       | 0.010        | 0.67         | 3.3             | 2.0          | 10.4         |
